# Supplementary material
Source: PubMed Central journal article supplement (PMC6237441)
Supplement: jciinsight-3-99722-s088.pdf [file jciinsight-3-99722-s088.pdf]

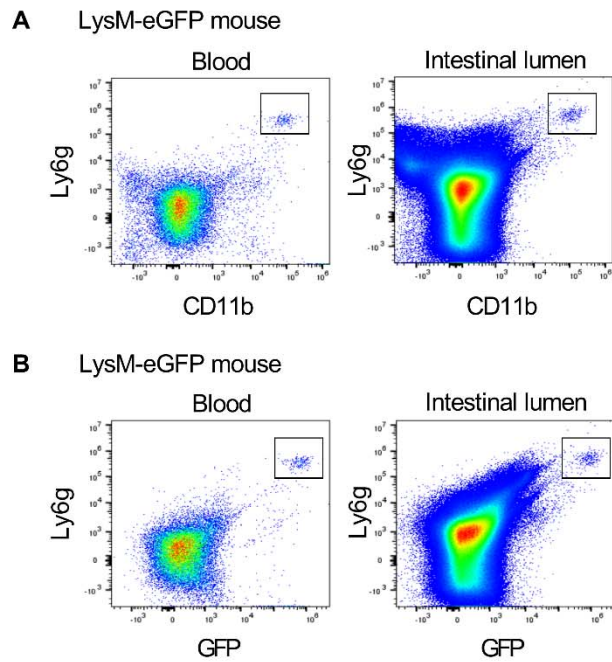

**Supplemental Figure 1. Validation of flow cytometry strategy used to quantify PMN in pcLoop luminal contents.** LysM-eGFP mice derived myelomonocytic cells (including PMN) expressing Green Fluorescent Protein. Images show flow cytometry dot-plots of circulating blood leukocytes or pcLoop luminal content after treatment with 1 nM LTB<sub>4</sub>. Cells were stained with antibodies against CD45, CD11b and Ly6G. **(A)** Outlined areas represent PMN gated as Ly-6G and CD11b positive cells or **(B)** PMN gated as Ly-6G and GFP positive cells. Results confirm accuracy of the flow cytometry strategy to quantify transmigrated PMN in the pcLoop lumen compartment.

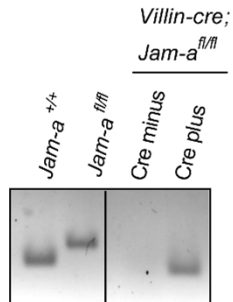

**Supplemental Figure 2. Intestinal epithelial specific loss of JAM-A in Villin-cre; Jam-a<sup>fl/fl</sup> mice.** Genotyping of Jam-a<sup>+/+</sup>, Jam-a<sup>fl/fl</sup> and Villin-cre; Jam-a<sup>fl/fl</sup> mice. Amplification of F11r/Jam-a by PCR on DNA isolated from tail snips was used to identify Jam-a<sup>+/+</sup>, (255bp) and Jam-a<sup>fl/fl</sup> (384bp) animals. To identify Villin-cre; Jam-a<sup>fl/fl</sup> mice conditional knockout animals from Jam-a<sup>fl/fl</sup> animals, a PCR specific for Villin-cre resulted in amplification of a 195bp DNA band from Villin-cre positive animals.

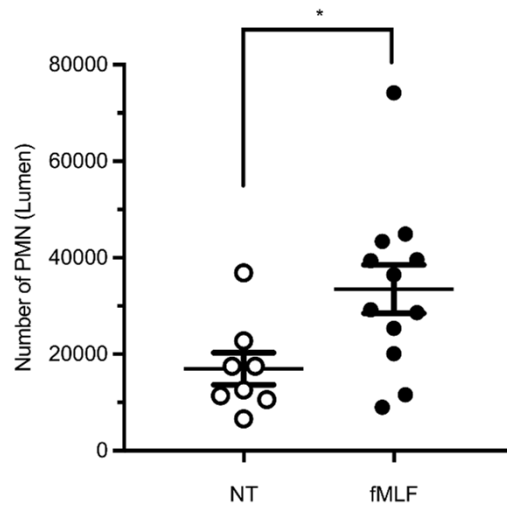

**Supplemental Figure 3. fMLF-dependent recruitment of PMN in the pcLoop.** Number of PMN recruited in the lumen of the pcLoop without chemoattractant (8 mice; white circles) or in presence of 1 mM bacterial peptide fMLF (12 mice; black circles). Data represent means  $\pm$  SEM;  $n=3$  independent experiments. \* $p=0.014$ ; two-tailed Student's t test.
